# Supplementary material
Source: publisher figshare collection journal article supplement (https://springernature.figshare.com/ndownloader/files/12533822)

**Additional File 2.** Microscopic analysis after 10 h post-invasion. Arrows, newly rings; NI, non-immunized IgG.

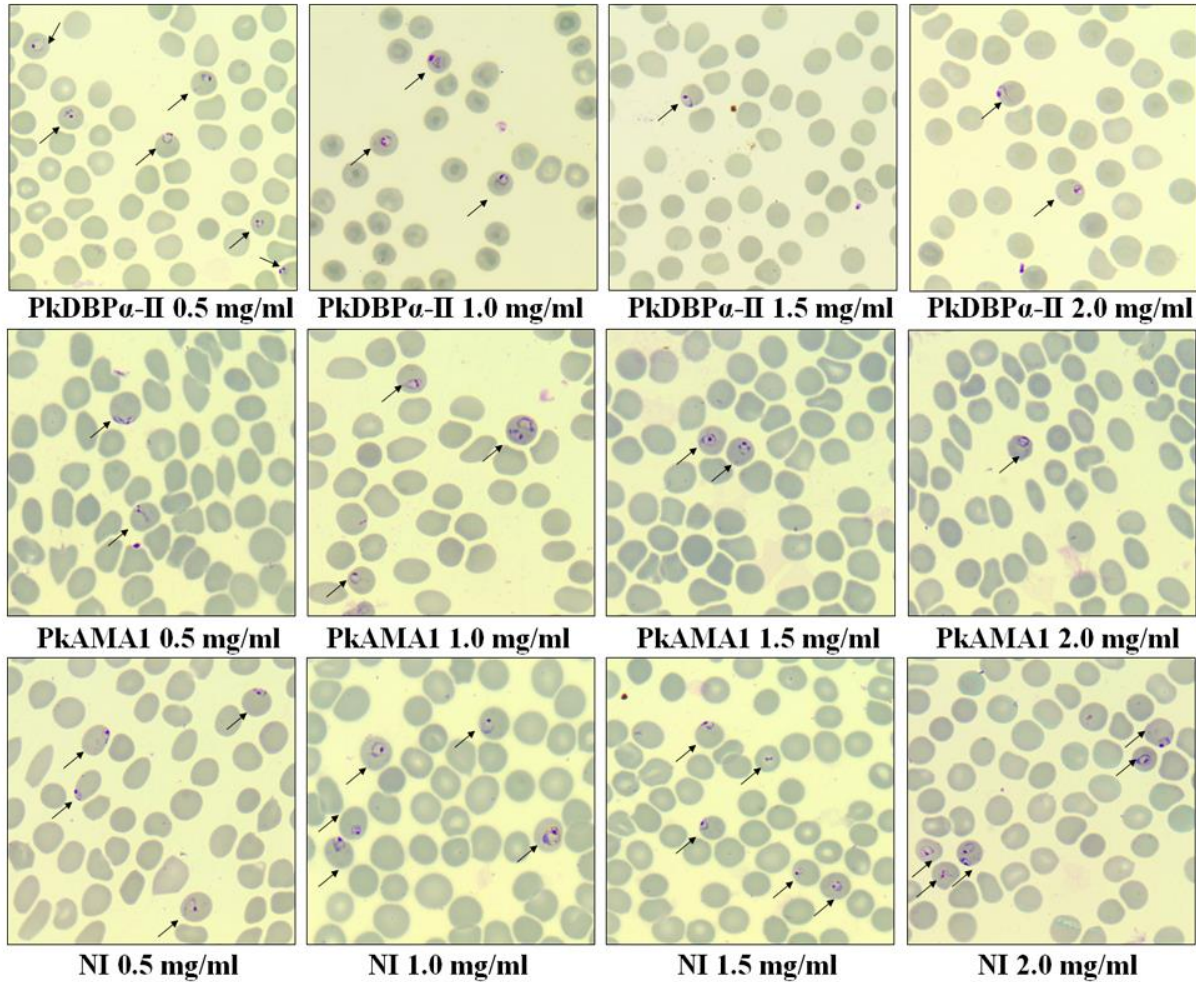

Supplement: Supplementary file [file 12533822]
